# Regulation of Hippocampal and Behavioral Excitability by Cyclin-Dependent Kinase 5

Ammar H. Hawasli<sup>1</sup>, Della Koovakkattu<sup>2</sup>, Kanehiro Hayashi<sup>1</sup>, Anne E. Anderson<sup>4</sup>, Craig M. Powell<sup>1,3</sup>, Christopher M. Sinton<sup>2</sup>, James A. Bibb<sup>1\*</sup>, Donald C. Cooper<sup>5</sup>

**1** Department of Psychiatry, University of Texas Southwestern Medical Center, Dallas, Texas, United States of America, **2** Department of Internal Medicine, University of Texas Southwestern Medical Center, Dallas, Texas, United States of America, **3** Department of Neurology, University of Texas Southwestern Medical Center, Dallas, Texas, United States of America, **4** Departments of Pediatrics, Neurology and Neuroscience, Baylor College of Medicine, Houston, Texas, United States of America, **5** Department of Psychology and Neuroscience, Institute for Behavioral Genetics, University of Colorado, Boulder, Colorado, United States of America

## Abstract

Cyclin-dependent kinase 5 (Cdk5) is a proline-directed serine/threonine kinase that has been implicated in learning, synaptic plasticity, neurotransmission, and numerous neurological disorders. We previously showed that conditional loss of Cdk5 in adult mice enhanced hippocampal learning and plasticity via modulation of calpain-mediated *N*-methyl-D-aspartic acid receptor (NMDAR) degradation. In the present study, we characterize the enhanced synaptic plasticity and examine the effects of long-term Cdk5 loss on hippocampal excitability in adult mice. Field excitatory post-synaptic potentials (fEPSPs) from the Schaffer collateral CA1 subregion of the hippocampus (SC/CA1) reveal that loss of Cdk5 altered theta burst topography and enhanced post-tetanic potentiation. Since Cdk5 governs NMDAR NR2B subunit levels, we investigated the effects of long-term Cdk5 knockout on hippocampal neuronal excitability by measuring NMDAR-mediated fEPSP magnitudes and population-spike thresholds. Long-term loss of Cdk5 led to increased Mg<sup>2+</sup>-sensitive potentials and a lower threshold for epileptiform activity and seizures. Biochemical analyses were performed to better understand the role of Cdk5 in seizures. Induced-seizures in wild-type animals led to elevated amounts of p25, the Cdk5-activating cofactor. Long-term, but not acute, loss of Cdk5 led to decreased p25 levels, suggesting that Cdk5/p25 may be activated as a homeostatic mechanism to attenuate epileptiform activity. These findings indicate that Cdk5 regulates synaptic plasticity, controls neuronal and behavioral stimulus-induced excitability and may be a novel pharmacological target for cognitive and anticonvulsant therapies.

**Citation:** Hawasli AH, Koovakkattu D, Hayashi K, Anderson AE, Powell CM, et al. (2009) Regulation of Hippocampal and Behavioral Excitability by Cyclin-Dependent Kinase 5. PLoS ONE 4(6): e5808. doi:10.1371/journal.pone.0005808

**Editor:** Vladimir Brezina, Mount Sinai School of Medicine, United States of America

**Received:** March 9, 2009; **Accepted:** May 7, 2009; **Published:** June 4, 2009

**Copyright:** © 2009 Hawasli et al. This is an open-access article distributed under the terms of the Creative Commons Attribution License, which permits unrestricted use, distribution, and reproduction in any medium, provided the original author and source are credited.

**Funding:** This work was made possible by a NIDA training grant (A.H.H.), NIDA K-award (D.C.C.), NARSAD Young Investigator award (D.C.C. and K.H.), Hartwell Foundation Biomedical Research Fellowship (C.M.P.), Lowe Foundation, VanBeber Family and Crowley Family (C.M.P.) and R01 grant from the National Institutes on Mental Health (J.A.B. and C.M.P.) and Drug Abuse (J.A.B. and D.C.C.). Portions of this research was made possible by the Gulf War Illness Research Program (Contract No. VA549-P-0027, Year 1 Task Order Obligation No. 549-D95018) from the US Department of Veterans Affairs/Veterans Affairs IDIQ contract (awarded administered by the Dallas, TX, VA Medical Center; C.M.P., J.A.B. and D.C.C.), for which we are obligated to state that the content of the information does not necessarily reflect the position or the policy of the Federal government, and no official endorsement should be inferred. The funders had no role in study design, data collection and analysis, decision to publish, or preparation of the manuscript.

**Competing Interests:** The authors have declared that no competing interests exist.

\* E-mail: james.bibb@utsouthwestern.edu

## Introduction

Cyclin-dependent kinase 5 (Cdk5), a proline-directed serine/threonine protein kinase, and its neuronal-specific activating cofactors have been implicated in numerous physiological and pathological processes in the mammalian nervous system [1–14]. Cdk5 has been implicated in hippocampal learning and synaptic plasticity [5,7,10,15–17] and the pathogenesis of neurodegenerative disorders, such as Alzheimer's disease and neuropsychiatric illnesses, such as addiction [2,15,18,19].

We previously reported that Cdk5 controls hippocampus-dependent learning and synaptic plasticity [7]. Conditional loss of Cdk5 improved performance in several hippocampal learning tasks and reduced the threshold for LTP induction. The enhancement in synaptic plasticity was due to increased NMDAR-mediated currents secondary to elevated surface expression of NR2B. Cdk5 was shown to facilitate the calpain-mediated degradation of NR2B upon activation of NMDARs. The

regulation of NMDAR degradation appears to play a critical role in synaptic plasticity [20].

Our initial study revealed a number of positive effects that resulted from conditional loss of Cdk5 in the brains of adult mice [7,15]. Inducible loss of Cdk5 in adult mice improved learning and increased NMDAR-mediated synaptic plasticity (2–4 weeks after knockout) [7,15]. Here, we report the effects of adult, conditional Cdk5 loss on the induction of synaptic plasticity and hippocampal and stimulation-induced behavioral excitability. Since the loss of Cdk5 enhanced plasticity via increased NMDAR-mediated currents, we examined NMDAR-mediated field excitatory postsynaptic potential (fEPSP) magnitudes and population-spike thresholds in knockout (KO) and control (WT) mice. Although enhanced hippocampal plasticity is associated with increased learning we hypothesized that synaptic plasticity associated with loss of Cdk5 would also lead to increased hippocampal epileptiform activity and seizure susceptibility.

## Results

### Conditional knockout of Cdk5

To circumvent the neonatal lethality of the constitutive Cdk5 KO mice and non-specificity of pharmacological inhibitors [11,21–23], conditional KO of Cdk5 was achieved by deriving mice in which loxP elements flanked critical exons in both Cdk5 alleles. Recombination was mediated with a transgenic estrogen receptor-Cre recombinase fusion, under control of the prion promoter [24] in response to a 15-day regimen of hydroxytamoxifen as previously described [7]. Hydroxytamoxifen-dosed wild-type littermate mice served as controls (WT).

### Altered theta burst synaptic response accompanies enhanced LTP after conditional knockout of Cdk5

LTP was induced in hippocampi from Cdk5 WT and KO animals within the SC/CA1 pathway on a 64-channel multielectrode array (**Figure 1A**). As expected, Cdk5 KO mice displayed a reduced threshold for LTP induction (**Figure 1B**) [7]. To determine if this enhancement was due to increased responsiveness during the theta burst stimulation (TBS) used to induce LTP we examined the fEPSPs during TBS. In WT slices, theta bursts briefly led to facilitation followed by moderate depression. In contrast, in KO slices, a TBS produced an immediate depression and subsequent larger magnitude depression compared to controls (**Figure 1C**). The 10 ms inter-stimulus interval produced a  $8.1 \pm 6.3\%$  facilitation in WT slices, but in KO slices we observed a  $12.9 \pm 4.7\%$  depression (**Figure 1C**; Burst 1, EPSP 2). Interestingly, this significant and notable discrepancy between WT and KO mice was specific for the shortest intervals of 10 ms (100 Hz). Paired-pulse potentiation at inter-stimulus intervals (ISI) between 25 and 800 ms (40–1.25 Hz) were not significantly different [9]. Repolarization after a theta burst stimulus is, in part, dependent on  $\text{Ca}^{2+}$ -activated  $\text{K}^{+}$ -channels [25]. To evaluate for possible aberrations in  $\text{Ca}^{2+}$ -activated  $\text{K}^{+}$ -channels, burst duration and repolarization were examined. Analysis revealed no differences between KO and WT in both burst duration and rebound during theta burst stimuli.

### Responses to CA1 hippocampal tetanic stimuli in WT and Cdk5 KO mice

To further evaluate synaptic plasticity in WT versus Cdk5 KO mice, responses to high and low frequency tetani were measured. The fEPSP amplitudes were measured during a 100-Hz high frequency tetanus in the presence of NMDAR antagonism. As with the TBS in **Figure 1**, this experiment revealed a paired-pulse disparity between KO and WT (**Figure 2A**). Because this experiment was performed in the presence of a NMDAR-antagonist, the enhanced depression was not due to NMDA activation. After the 2<sup>nd</sup> pulse, Cdk5 KO and WT mice displayed similar responses to 100-Hz tetani (**Figure 2A**). The fEPSPs during low frequency tetani are often measured to assess the status of the presynaptic reserve vesicle pool. A 14 Hz train in the presence of a NMDAR antagonist elicited equivalent fEPSP facilitation followed by vesicle depletion and fEPSP depression in both groups (**Figure 2B**). In the presence of NMDA antagonism these data show no detectable aberration in the presynaptic reserve vesicle pool due to Cdk5 loss.

### Conditional loss of Cdk5 leads to an enhancement in CA1 hippocampal post-tetanic potentiation

After a high frequency tetanus, neurons exhibit a form of short-term plasticity called post-tetanic potentiation (PTP). Although

much of this phenomenon remains uncharacterized, PTP is likely due to a tetanus-induced elevation in presynaptic  $\text{Ca}^{2+}$  which leads to a short-lived increase in vesicle release [26]. Changes in PTP could result from alterations in presynaptic  $\text{Ca}^{2+}$  channel properties or the size of the readily releasable pool of vesicles. Conditional loss of Cdk5 led to an enhancement in PTP following a either a 100 Hz tetanus (**Figure 2C**) or TBS [7]. In the presence of a NMDAR antagonist, a 100 Hz tetanus produced  $120.7 \pm 4.3\%$  and  $142.4 \pm 9.7\%$  PTP in WT and KO slices, respectively. These findings indicate that loss of Cdk5 enhances NMDA-independent short-term plasticity.

### Conditional loss of Cdk5 leads to elevated $\text{Mg}^{2+}$ -sensitive potentials

In addition to their role in LTP induction, NMDARs play key roles in many intracellular signaling cascades, neuronal excitability as well as seizure generation [27]. Consequently, *in vitro* slice physiology epileptiform activity is often measured in  $\text{Mg}^{2+}$ -free conditions [28,29]. Since loss of Cdk5 led to a NMDAR-mediated enhancement in synaptic plasticity, we analyzed  $\text{Mg}^{2+}$ -sensitive potentials in Cdk5 KO mice, thus allowing measurement of fEPSPs containing a predominant NMDA component.  $\text{Mg}^{2+}$ -sensitive evoked fEPSP measurements were taken within the SC/CA1 hippocampal pathway. The removal of NMDA receptor  $\text{Mg}^{2+}$ -blockade produced a 1.71-fold larger fEPSP amplitude change in KO than WT ( $148.9 \pm 7.6$  vs.  $128.6 \pm 4.7\%$  of baseline, respectively; **Figure 3A, left**). There was also greater overall charge transfer in Cdk5 KO mice versus controls as measured by fEPSP areas ( $162.3 \pm 4.4$  vs.  $145.2 \pm 5.7\%$  of baseline, respectively; **Figure 3A, right**). These findings indicate that loss of Cdk5 led to increased  $\text{Mg}^{2+}$ -sensitive post-synaptic potentials suggesting increased NMDAR function.

### Chronic loss of Cdk5 reduced threshold for epileptiform population-spike activity

Hippocampal NMDAR activation is an important step in many *in vitro* and *in vivo* seizure models [27]. Abnormal neuronal excitability may produce epileptiform-like activity in acute brain slices. Hyperexcitability can be characterized by an increased propensity for populations of cells to fire in synchrony generating, so called, population spikes. We examined whether conditional loss of Cdk5 increased susceptibility to *in vitro* epileptiform activity in the SC/CA1 pathway after unmasking NMDARs. Synaptically-evoked fEPSPs in the *stratum pyramidale* were measured in  $\text{Mg}^{2+}$ -free conditions. Stimulation of the SC/CA1 pathway at 20%-maximal stimulation intensity produced population spikes in  $3.7 \pm 2.5\%$  of WT and  $10.4 \pm 5.0\%$  of KO slices. A stronger 50%-maximal stimulation intensity produced population spikes in  $89.6 \pm 4.0\%$  of KO slices but only  $16.74 \pm 7.7\%$  of WT slices (**Figure 3B**). Stronger stimulation intensities elicited population spikes in greater number and larger magnitude in both KO and WT slices. These results suggest show that loss of Cdk5 reduces the threshold to induce evoked epileptiform activity in hippocampal slices.

Aberrations in  $\text{Na}^{+}$  channel properties can affect neuronal excitability [30–33] and  $\text{Na}^{+}$  channel antagonists serve as a therapeutic anticonvulsants. Basal population-spike thresholds are dependent on  $\text{Na}^{+}$  channel activation. Therefore, we surveyed the basal *in vitro* population-spike threshold and the effects of partial  $\text{Na}^{+}$  channel blockade on fEPSPs. To analyze population spike threshold, input/output measurements were collected in the *stratum radiatum* and *pyramidale*. The stimulation thresholds to induce population spikes in both layers were equivalent between groups. Furthermore, partial blockade (>50%) of  $\text{Na}^{+}$  channels with

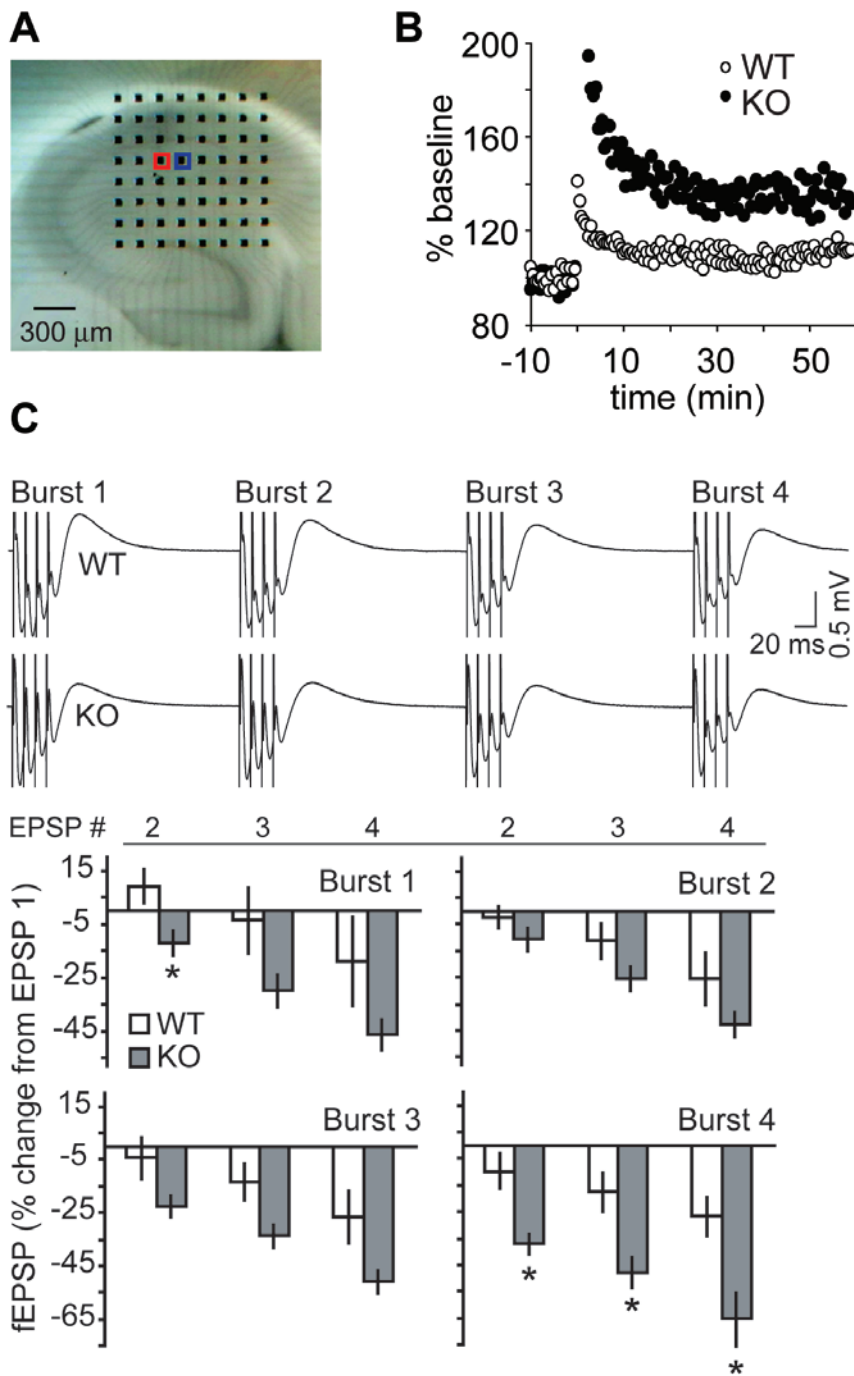

**Figure 1. Altered theta burst topography in SC/CA1 pathway accompanies enhanced LTP in Cdk5 KO mice.** *A*, An acute hippocampal slice resting on MED-64 multi-electrode array. fEPSPs were recorded (blue) after stimulation of the SC/CA1 pathway (red). *B*, LTP after a ten-burst theta stimulus in representative WT and KO slices plotted as percent amplitude of baseline (–10 to 0 min). *C*, Effects of Cdk5 KO on theta-burst responses. Representative theta burst traces were extracted from LTP experiment illustrated in *B*. Quantitation plotted as percentage change in amplitude (relative to the 1st fEPSP) of the 2<sup>nd</sup>, 3<sup>rd</sup>, and 4<sup>th</sup> field EPSP within a single stimulus train of 4 pulses at 100 Hz in control and KO slices. The measures are shown for bursts 1–4 of a train. Similar results were obtained with slope calculations,  $n=5-8$ . \* $P<0.05$  vs. WT; *post hoc* *t*-test. Data represent mean  $\pm$  s.e.m.

doi:10.1371/journal.pone.0005808.g001

50 nM TTX produced no changes from baseline in fiber volley or fEPSP amplitudes in KO and WT groups (**Figure 4A**). Loss of Cdk5 lowered the threshold for population spikes and this could not be rescued by substantial reduction (>50%) in Na<sup>+</sup> channel availability [34].

Although the increase in NMDAR-mediated current in Cdk5 KO mice [7] likely contributes to the neuronal hyperexcitability, additional mechanisms are also possible. Statistical analysis of basal synaptic responses in the SC/CA1 *stratum radiatum* layer in Mg<sup>+</sup>-containing conditions revealed that Cdk5 KO mice, 2–4

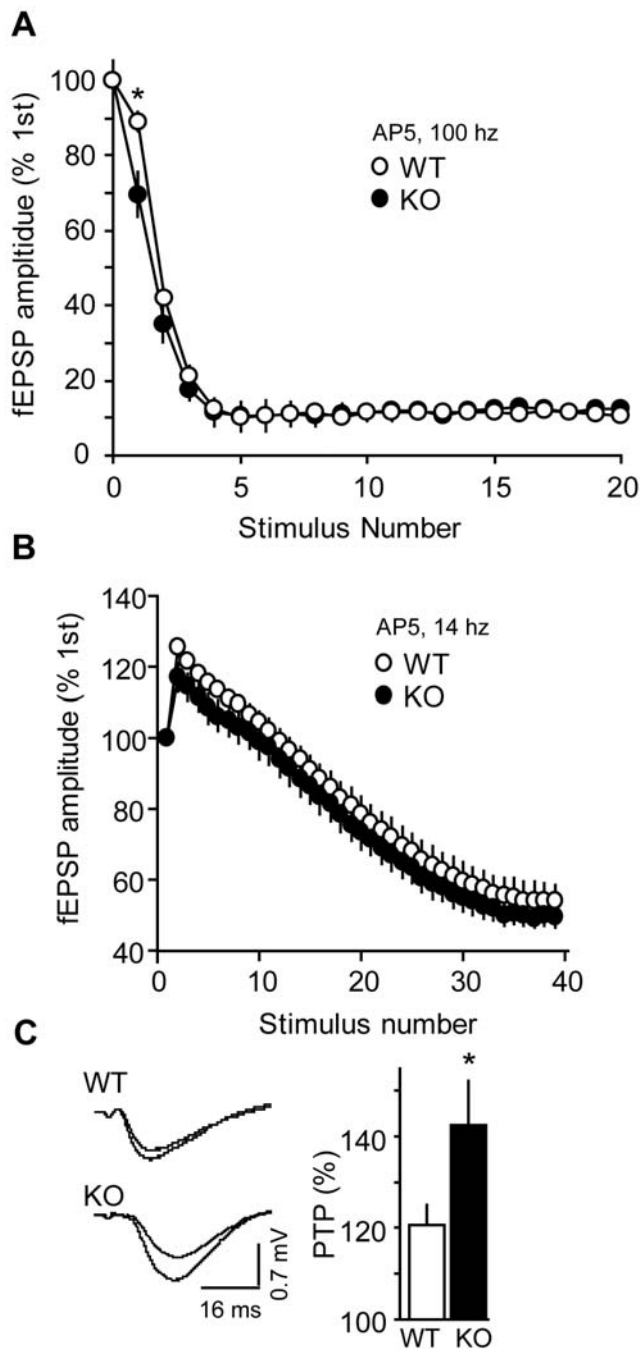

**Figure 2. Tetanic stimulation and post-tetanic potentiation after conditional loss of Cdk5.** *A*, fEPSPs during high frequency tetanus. fEPSPs amplitudes during 100 Hz tetani are plotted relative to the 1<sup>st</sup> response in the presence of 75  $\mu$ M AP5. Asterisk indicates that the 2<sup>nd</sup> fEPSP during the train was significantly different between WT and KO ( $P < 0.05$ , student's *t*-test). *B*, Effects of Cdk5 KO on fEPSPs during low frequency tetanus. fEPSPs amplitudes during 14 Hz tetani are plotted relative to the 1<sup>st</sup> response in the presence of 75  $\mu$ M AP5. *C*, Post-tetanic potentiation after a 100 Hz stimulus. Representative traces and fEPSP amplitudes were measured and plotted relative to baseline (75  $\mu$ M AP5,  $n = 5-8$ ;  $P < 0.05$ , student's *t*-test). Data represent mean  $\pm$  s.e.m. doi:10.1371/journal.pone.0005808.g002

weeks post-KO, had significantly longer fEPSP half-widths compared to WT mice ( $7.7 \pm 0.4$  vs.  $6.3 \pm 0.4$  ms, respectively; **Figure 4B**). This increase in fEPSP duration likely represents an

impairment in repolarization and may contribute to increased neuronal excitability. Antagonism of NMDARs,  $Ca^{2+}$  channels, and  $Na^{+}$  channels did not reverse the elevated fEPSP half-width in Cdk5 KO mice (not shown). Impairments in inhibitory signaling could result in behavioral hyperexcitability [27,35,36]. Therefore, the effects of GABA<sub>A</sub> channel antagonists on fEPSPs were measured. Administration of SR95531 led to equivalent increases in fEPSP amplitudes in WT and KO ( $20.1 \pm 5.2$  vs.  $25.1 \pm 12.1\%$  increase from baseline, respectively; **Figure 4C**, left). However, SR95531 decreased the fEPSP half-width in WT but not KO slices ( $-12.8 \pm 5.9\%$  vs.  $+5.9 \pm 1.7\%$  change, respectively; **Figure 4C** right). These results suggest that GABA<sub>A</sub>-mediated signaling in Cdk5 KO mice may compensate for the increased fEPSP duration.

#### Increased behavioral seizure susceptibility follows chronic loss of Cdk5

Although NMDARs are critical for synaptic plasticity and learning, too much NMDAR activity may be harmful [37]. During our studies, we found that prolonged loss of Cdk5 was associated with handling induced seizures and lethality when compared with controls. This observation prompted quantitative assessment of susceptibilities to handling-, pharmacologically-, and audiogenically-induced seizures. Hydroxytamoxifen-dosed *Cre* negative mice (WT) and vehicle-dosed animals carrying the *Cre* transgene alone displayed no spontaneous, handling-induced, or audiogenically-induced seizures. Furthermore, pharmacologically-induced behavioral seizure susceptibilities and latencies were equivalent between the vehicle-dosed and WT groups (not shown). On the other hand, chronic loss of Cdk5 led to handling-induced head nodding, wet dog shakes, or clonus behavioral seizures in 80% of mice after 8 weeks of Cdk5 KO (**Figure 5A**, top; **Table 1**). While mild handling induced Racine scale 1–3 class seizures, more stressful conditions, such as water immersion, triggered Racine scale 3–5 seizures, tonus and death in additional cohorts of chronic KO mice. Interestingly, increased seizure susceptibility correlated with lethality as loss of Cdk5 for 8 weeks and daily handling resulted in 40% mortality (**Figure 5A**, bottom; **Table 1**). In summary, chronic loss of Cdk5 led to increases susceptibility to handling-induced behavioral seizures and increases lethality.

To evaluate and quantify seizure susceptibility in Cdk5 KO mice, seizure latencies were scored after animals were treated with a convulsant, pilocarpine. Cdk5 KO mice displayed increased susceptibility (**Table 1**) and significantly shorter latencies than WT to undergo wet dog shakes ( $5.4 \pm 0.6$  vs.  $17.3 \pm 4.3$  min, respectively), clonus ( $9.0 \pm 3.0$  vs.  $19.3 \pm 4.8$  min), and rearing and falling ( $12.53 \pm 1.9$  vs.  $37.0 \pm 12.3$  min; **Figure 5B**). Hence, Cdk5 KO led to 68.7%, 53.7%, and 66.2% decreases in mean latencies to induce wet dog shakes, clonus, and rearing and falling behavioral seizures. Chronic loss of Cdk5 led to increase central nervous system excitability exhibited by the decreased threshold for chemically-induced seizures.

Cranial electroencephalographic (EEG) electrodes and electromyographic (EMG) electrodes were implanted into mice and spontaneous activity was recorded for characterization of electrographic activity in WT versus Cdk5 KO mice. After loss of Cdk5 for 8 weeks, KO mice displayed epochs of multiple bursts (at 3–4 Hz) of spike waves which correlated with tremor activity on EMG (**Figure 5C–D**). Post- and inter-ictally, there were normal EEG/EMG activities during wakefulness and sleep (**Figure 5E–F**). Seizure activity was not observed in littermate hydroxytamoxifen-dosed WT controls (**Figure S1**). In summary, loss of Cdk5 for 2 months led to increased lethality, elevated seizure susceptibility, and electrographic evidence of seizure activity.

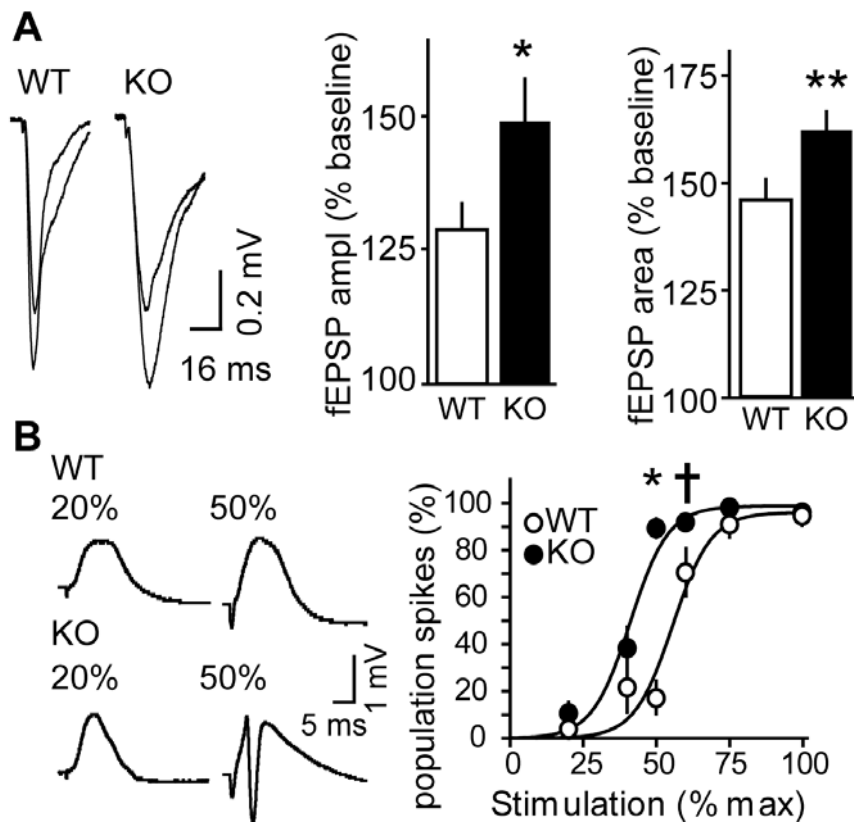

**Figure 3. Increased  $Mg^{2+}$ -sensitive post-synaptic potential and reduced threshold for epileptiform activity after conditional loss of Cdk5.** A, Representative traces and quantitation of fEPSP amplitude ( $n=12$ ) and area ( $n=6$ ) in the *stratum radiatum* relative to baseline following  $Mg^{2+}$  wash-out. B, Representative traces and quantitation showing reduced threshold for population spikes in the *stratum pyramidale* of KO slices after stimulation in the hippocampal SC/CA1 pathway in  $Mg^{2+}$ -free conditions. Quantitation shows % of slices displaying population spikes at indicated stimulation intensities (% of maximum). Recordings were performed 4–6 weeks post-KO.  $n=16-18$ ; ANOVA revealed a main effect of genotype ( $F_{1,217}=36.16$ ,  $p<0.0001$ ), stimulation ( $F_{6,217}=115.41$ ,  $p<0.0001$ ) and interaction between genotype and stimulation ( $F_{6,217}=11.76$ ,  $p<0.0001$ ). \*\* $P<0.05$ , \* $P<0.01$ , † $P=0.067$  vs. WT, *post hoc t*-test. Data represent mean  $\pm$  s.e.m. doi:10.1371/journal.pone.0005808.g003

### Increased acoustic startle reactivity in Cdk5 KO mice

As an additional study of behavioral excitability, the brainstem primary acoustic startle circuit was examined by measuring acoustic startle reactivity. Animals were exposed to auditory stimuli (white noise) at various decibels and startle responses were measured. Cdk5 KO startle responses were  $1.8 \pm 0.6$ -,  $2.2 \pm 0.5$ -,  $2.5 \pm 0.4$ -, and  $2.3 \pm 0.6$ -fold larger than WT after 90, 100, 110, and 120 db pulses, respectively (Figure 6A). No differences between WT and KO were observed in habituation of startle responses (Figure 6B) or pre-pulse acoustic inhibition (Figure 6C). Thus, loss of Cdk5 in the adult brain elevated the acoustic startle responses but had no detectable difference on short-term acoustic habituation or pre-pulse inhibition.

### Audiogenic behavioral seizures after chronic loss of Cdk5

Audiogenic stimulation rarely produces seizures in healthy wild types animals. However, in special animal breeds, after kindling, or with certain genetic modifications, high-frequency acoustic tones can produce behavioral and electrographic seizure activity. While chemically-induced seizures are generally thought to model seizures of hippocampal or temporal lobe origin, audiogenic seizures may originate in the brainstem [29]. Given that loss of Cdk5 led to increases in acoustic startle reactivity, we examined

whether loss of Cdk5 reduced the susceptibility to audiogenic seizures. Short-term loss of Cdk5 (2–4 weeks) did not increase susceptibility to audiogenic behavioral seizures (0/10 short-term Cdk5 KO animals exhibited behavioral seizure activity). In contrast, prolonged loss of Cdk5 (for 8 weeks) increased susceptibility to audiogenically-induced seizures. High frequency audiogenic stimulation had no effect on WT but induced wild running in 37% of KO mice in 32.3 sec (Table 2). Wild running progressed to tonic-clonic seizures and tonus followed by death in 18% of KO animals within 56.0 sec. Consequently, chronic loss of Cdk5 in the adult brain increased the propensity towards acoustically-induced behavioral seizures.

### Status epilepticus and electroconvulsive shock leads to the production of Cdk5-activating cofactor in the hippocampus

Both conditional KO of Cdk5 [7] and transient overexpression of p25 [5] result in increased synaptic plasticity and learning. There may be common mechanistic features between loss of Cdk5 and diversion of Cdk5 to form a complex with p25. Interestingly, human hippocampal sclerosis is accompanied by p25 generation and altered Cdk5 activity [38]. To further assess the role of Cdk5 in acute seizures and the homeostasis of neuronal excitability,

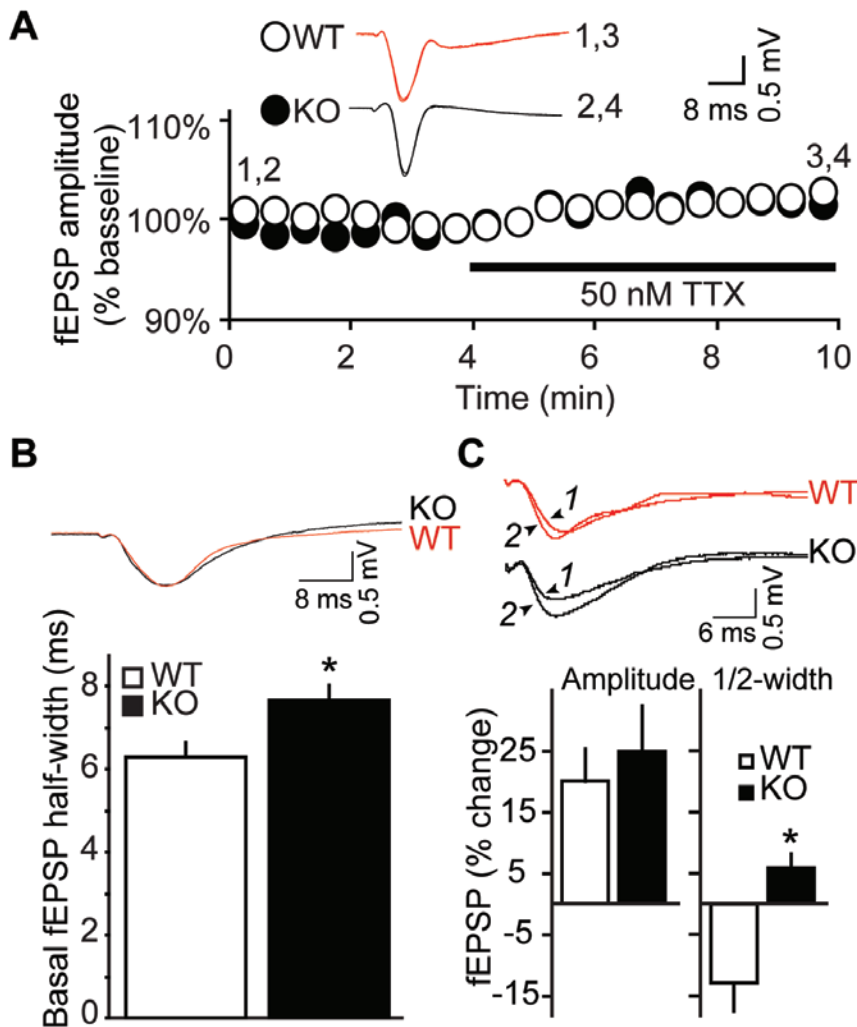

**Figure 4. GABA<sub>A</sub>-mediated signaling partially compensates for increased fEPSP half-width in Cdk5 KO mice.** **A**, Effect of partial Na<sup>+</sup>-channel blockade on fEPSP amplitude. Representative fEPSPs traces from WT (red) and KO (black) are shown before and after TTX treatment (n = 12). **B**, Increased basal fEPSP half-width in SC/CA1 pathway of KO hippocampus. Representative fEPSPs traces from WT (red) and KO (black) are shown with quantitation (n = 9–10). **C**, Representative fEPSPs traces before and after GABA<sub>A</sub> blockade (top) are shown with quantitation (bottom). Histograms show the changes in amplitude and half-width following treatment with 2 μM SR95531 (n = 7). 1 and 2 indicate traces before and after treatment with SR95531, respectively. SR95531 had similar effects on fEPSP slope measurement. \*P < 0.05 vs. WT; *post hoc t*-test. doi:10.1371/journal.pone.0005808.g004

status epilepticus was induced pharmacologically in WT mice and p25 levels were assessed in hippocampal lysates. Kainate-induced status epilepticus led to 5.0 ± 2.7- and 3.9 ± 1.3-fold increases in p25 level and p25/p35 ratio, respectively (Figure 7A, left). Similarly, pilocarpine-induced status epilepticus caused 2.8 ± 0.8- and 2.5 ± 0.6-fold increases in p25 level and p25/p35 ratio (Figure 7A, right). Hence, chemically-induced status epilepticus in normal WT animals caused p25 levels in increase in hippocampal lysates.

Chemically-induced acute seizures only represents one of many models used to study seizures. Generation of p25 was also analyzed following electrical electroconvulsive shock. Electroconvulsive shock, which causes broad forebrain epileptiform activity, is clinically used to treat depression [39] and experimentally used for the generation of seizures [40]. Acute electroconvulsive shock resulted in time-dependent accumulation in p25 in hippocampus (Figure 7B). Sixty minutes following electroconvulsive shock, p25 levels increased 2.47 ± 0.08-fold. The findings suggest that both

pharmacologically- and electrically-induced epileptiform activity results in accumulation of the Cdk5 activating cofactor, p25.

#### Chronic but not acute loss of Cdk5 leads to reduced levels of Cdk5-activating cofactor in the hippocampus

Studies implicating Cdk5 and p25 in neuronal excitability suggest that Cdk5 may be activated in order to either attenuate or modulate excitability during seizures. Since Cdk5 KO mice displayed elevated neuronal excitability and susceptibility to seizures, we examined the levels of p25 in Cdk5 KO mice. Hippocampi from subacute Cdk5 KO mice (2–4 weeks after KO) contained similar levels of p25 compared with controls (111.7 ± 13.7% of WT, p = 0.6). However, chronic loss of Cdk5 for 6–8 weeks led to a 58.4 ± 12.4% reduction in basal levels of p25 (Figure 7C). Consequently, chronic but not acute loss of Cdk5 leads to reduced levels of p25. The decrease in p25 levels corresponds to an increase in neuronal excitability and seizure susceptibility.

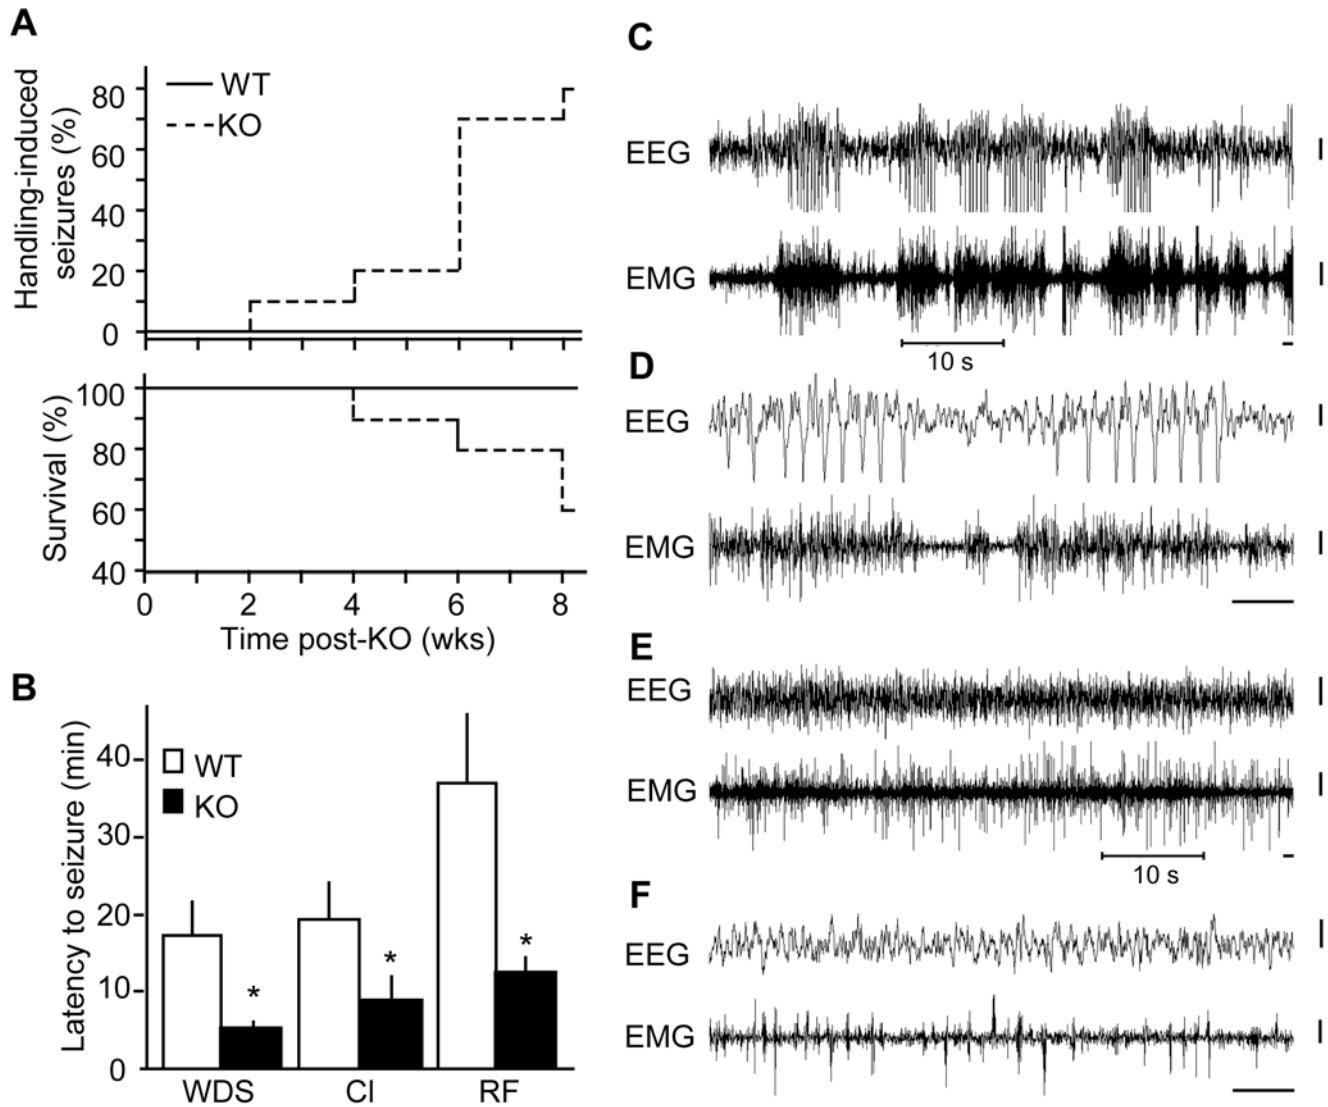

**Figure 5. Elevated seizure susceptibility after chronic conditional Cdk5 loss.** *A*, Kaplan-Meier seizure morbidity and survival curves. Percent of animals observed to have handling-induced seizures and percent survival are plotted against weeks post-KO;  $n=10-14$ ; the differences for morbidity and mortality were statistically significant,  $P<0.01$ , log-rank test. *B*, Latency to pilocarpine-induced wet-dog shakes (WDS), clonus (CI), and rearing/falling (RF) seizures in mice, 8 weeks post-KO ( $n=7-10$ ).  $*P<0.05$  vs. WT, Student's *t*-test. Data represent means  $\pm$  s.e.m. *C-F*, Representative spontaneous EEG/EMG recordings from a conditional KO mouse, 8 weeks post-KO. *C*, Appearance of multiple bursts (at 3–4 Hz) of spike waves which were frequently clustered as shown and accompanied by evident tremor and clonic seizures. *D*, Expanded view of 10 sec of the recording period shown in Figure *C*, displaying two spike bursts separated by about 2 sec. *E*, Post-ictally, there was rapid return to normal EEG/EMG and resumption of ongoing activity as displayed here during a period of wakefulness. *F*, Expanded view of 10 sec of the recording period shown in Figure *E*, Calibration 1 sec and 50  $\mu$ V; the recording periods shown in panels *D* and *F* are annotated by the 10 sec bars in *C* and *E* respectively. doi:10.1371/journal.pone.0005808.g005

**Table 1. Long-term conditional Cdk5 knockout increases susceptibility to seizures.**

| Category of seizures            | genotype | Morbidity  | Seizure latency (wks <sup>1</sup> ) | Mortality <sup>2</sup> |
|---------------------------------|----------|------------|-------------------------------------|------------------------|
| Handling-induced                | WT       | 0% (0/12)  | n/a                                 | 0% (0/12)              |
|                                 | KO       | 80% (8/10) | 5.63 $\pm$ 0.53                     | 40% (4/10)             |
| Category of seizures            | genotype | Clonus     | Status epilepticus                  | Tonus & Death          |
| Chemically-induced <sup>3</sup> | WT       | 71% (5/7)  | 57% (4/7)                           | 42% (3/7)              |
|                                 | KO       | 100% (7/7) | 100% (7/7)                          | 86% (6/7)              |

<sup>1</sup>Weeks after last dose of hydroxytamoxifen.

<sup>2</sup>Within 8 wks.

<sup>3</sup>325 mg/kg pilocarpine, i.p./2.5 mg/kg scopolamine, s.c.

doi:10.1371/journal.pone.0005808.t001

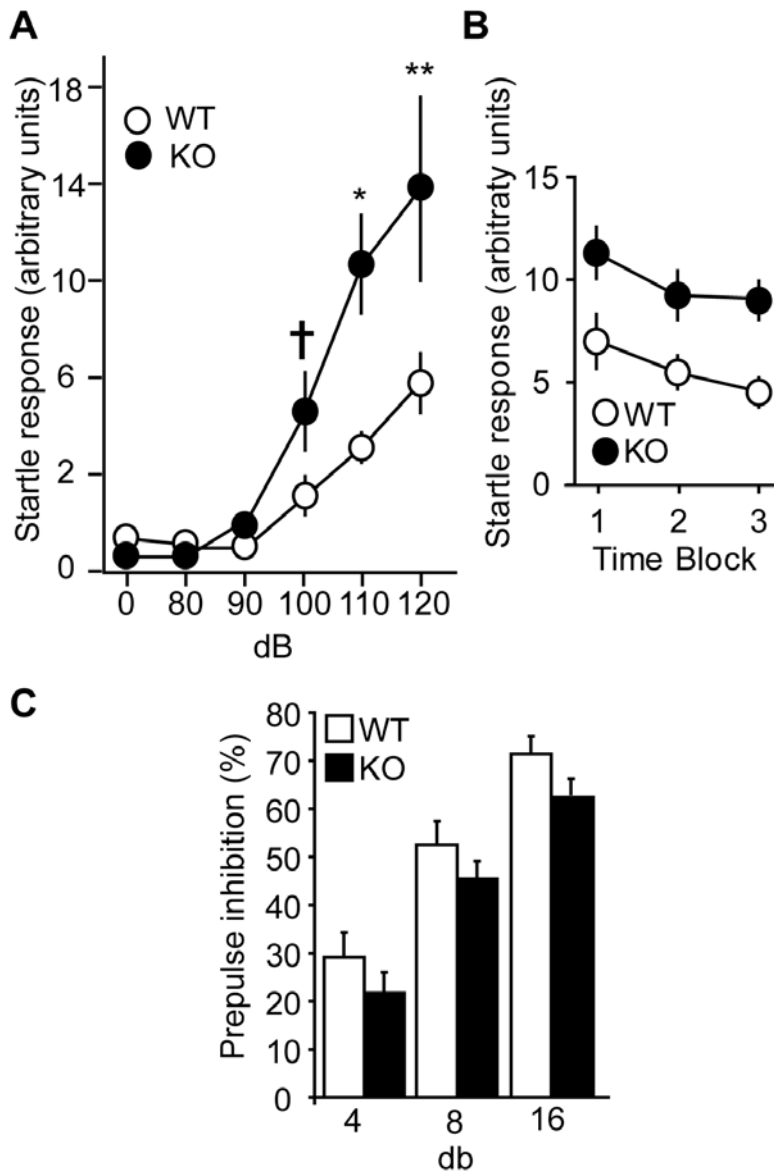

**Figure 6. Increased acoustic startle reactivity with normal short-term acoustic habituation and prepulse inhibition in Cdk5 KO mice.** A, Acoustic startle reactivity in Cdk5 KO mice (4–8 weeks post-KO,  $n=17-19$ ). ANOVA revealed a main effect of genotype ( $F_{1,204}=16.35$ ,  $p<0.0001$ ), decibels ( $F_{5,204}=19.67$ ,  $p<0.0001$ ) and interaction between genotype and decibels ( $F_{5,204}=3.72$ ,  $p=0.003$ ). \* $P<0.01$ , \*\* $P<0.001$ , † $P=0.08$  vs. WT, *post hoc t*-test. B, Habituation to a 120 db sound is shown as startle reactivity in three consecutive time blocks. ANOVA revealed effects of genotype ( $F_{1,68}=8.62$ ,  $p<0.006$ ) and trial ( $F_{2,68}=14.65$ ,  $p<0.0001$ ) but no interaction between genotype and trial ( $F_{2,68}=0.31$ ,  $p=0.7326$ ).  $n=17-19$ . C, Prepulse inhibition in Cdk5 KO mice. Prepulse at indicated decibels were given 5 ms prior to a 120 db sound. Prepulse inhibition is represented as percent decrease compared to an isolated 120 db sound. ANOVA revealed effect of decibel ( $F_{2,32}=143.74$ ,  $p<0.0001$ ) but no effect of genotype ( $F_{1,32}=2.03$ ,  $p=0.1735$ ) or interaction ( $F_{2,32}=0.78$ ,  $p=0.469$ ).  $n=8-10$ . Vehicle-treated animals behaved similarly to WT. Data represent mean  $\pm$  s.e.m. doi:10.1371/journal.pone.0005808.g006

**Table 2. Audiogenic seizures after long-term conditional Cdk5 knockout<sup>1</sup>.**

| Genotype | Wild Running |                | Tonic-clonic seizure |                 | Tonus/death |                |
|----------|--------------|----------------|----------------------|-----------------|-------------|----------------|
|          | Morbidity    | Latency (s)    | Morbidity            | Latency (s)     | Morbidity   | Latency (s)    |
| WT       | 0% (0/10)    | n/a            | 0% (0/10)            | n/a             | 0% (0/10)   | n/a            |
| KO       | 27% (3/11)   | 32.3 $\pm$ 6.7 | 18% (2/11)           | 50.0 $\pm$ 11.0 | 18% (2/11)  | 56.0 $\pm$ 6.0 |

<sup>1</sup>After exposure to 90 db, 2.8 kHz pulse tone for 3 min  
doi:10.1371/journal.pone.0005808.t002



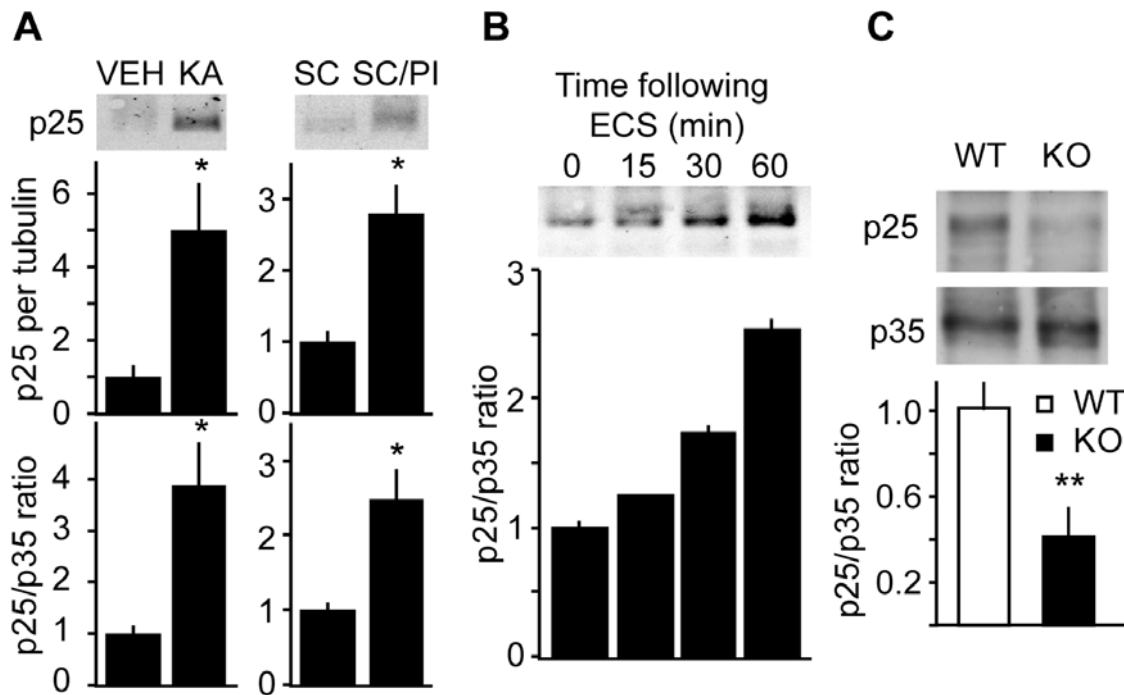

**Figure 7. p25 generation in the hippocampus after pharmacologically-induced status epilepticus and electroconvulsive shock.** **A**, Representative immunoblots (top) and quantitation of p25 per tubulin (middle) and p25/p35 ratio (bottom) after treatment with kainate and pilocarpine. VEH = saline; KA = kainate (50 mg/kg); SC = scopolamine (2 mg/kg)/saline; and SC/PI = scopolamine (2 mg/kg)/pilocarpine (280 mg/kg).  $n = 4$ ; \* $P < 0.05$  vs. VEH and SC in; Student's  $t$ -test. **B**, Representative immunoblots of p25 and quantitation of p25/p35 ratio 15, 30, and 60 min following electroconvulsive shock administration compared to unshocked controls (time = 0);  $n = 2$ . **C**, Hippocampal p25:p35 ratio 6–8 weeks post-KO. Crude lysates were immunoblotted for p25 and p35. Double asterisk indicates  $P < 0.05$  versus aged WT, Student's  $t$ -test;  $n = 3–4$ . Data represent means  $\pm$  s.e.m.

doi:10.1371/journal.pone.0005808.g007

## Discussion

Previous studies have implicated Cdk5 in the regulation of neuronal excitability [1]. Cdk5 has been suggested to both increase [41,42] and decrease [43] neurotransmitter release and modulate striatal neuron excitability [1]. Cdk5 has specifically been implicated in exocytosis and endocytosis via phosphorylation of numerous substrates including synapsin, amphiphysin I, dynamin, and others [44–47]. We previously demonstrated that conditional loss of Cdk5 led to enhancements in plasticity and learning via modulation of NMDAR degradation [9]. Furthermore, transient overexpression of Cdk5-activating cofactor, p25, increases NMDAR-mediated plasticity and synaptic transmission [7,15].

Here, we further characterize the enhancement of hippocampal plasticity in Cdk5 KO mice by studying fEPSPs during theta bursts and tetanic stimuli. We first show that within the SC/CA1 pathway, Cdk5 KO mice displayed altered LTP-inducing TBS topography. During the detailed LTP analyses, we find that loss of Cdk5 also leads to an NMDAR-independent enhancement in PTP, a presynaptic form of short-term plasticity. Although Cdk5 KO had no effect on paired pulse facilitation (PPF) with interstimulus intervals between 25 and 800 [7], Cdk5 KO did lead to depression with a shorter 10 ms inter-stimulus interval. Cdk5 may theoretically confer these changes by increasing the number of presynaptic vesicles, increasing presynaptic  $Ca^{2+}$ -influx, or increasing sensitivity to presynaptic  $Ca^{2+}$ . Changes in probability of presynaptic vesicle release are usually accompanied by broad impairments in PPF. However, since loss of Cdk5 only conferred a PPF deficit at a very short interstimulus interval, additional information is necessary to better elucidate Cdk5's role

in the presynapse. Although several studies implicate Cdk5 in vesicle release and recycling [41–43,48], the exact nature of Cdk5's role in the presynaptic compartment is still unclear. Future studies examining Cdk5's role in presynaptic terminal would be beneficial.

Conditional loss of Cdk5 initially leads to enhanced learning, plasticity and increased NMDAR-mediated currents [7]. In the present study, electrophysiological extracellular hippocampal recordings *in vitro* reveal that conditional loss of Cdk5 also leads to elevations in fEPSPs with a predominant NMDA component and reduced threshold for population-spike activity. It is known that the NR2B NMDAR subunit directly modulates neuronal excitability and contributes to seizures [49–52], so it is possible that a similar mechanism is involved following loss of Cdk5. Other mechanisms may also contribute to the enhanced hippocampal excitability. For example, loss of Cdk5 led to a subtle impairment in fEPSP repolarization in the hippocampal SC/CA1 pathway. Nonetheless, the data suggests that Cdk5 functions to attenuate hippocampal neuronal excitability via several mechanisms including the modulation of NMDARs.

Over time, Cdk5 KO mice displayed an increase in seizure susceptibility, suggesting a progressive increase in excitability. Chronic loss of Cdk5 increased the propensity for pharmacologically- and audiogenically-induced seizures. The reduced threshold for behavioral seizure activity correlated with EEG/EMG evidence of spontaneous seizures. Given the complexity, impact, and significance of spontaneous seizure activity, additional EEG recordings over an extended period of are warranted in future studies. In addition, conditional Cdk5 KO mice also displayed an increase in behavioral startle reactivity. We also found an

association between the seizure phenotype and the lethality in Cdk5 KO mice: after 10 weeks of Cdk5 KO, the majority of Cdk5 KO mice displayed signs of increased behavioral excitability and propensity towards handling-induced seizures. Up to 40% of affected mice died soon after displaying seizure activity.

The electrophysiological and behavioral experiments reveal similar trends. Initially, Cdk5 KO mice display increased NMDAR-mediated currents, enhanced plasticity, and impaired neuronal repolarization. Later, mice exhibit increased startle reactivity and reduced threshold for *in vitro* population spikes. Then, mice exhibit spontaneous electrographic seizures, handling-induced seizures, audiogenic seizures and lower threshold for pharmacologically-induced seizures. Although the experiments were performed at varying time-points after Cdk5 KO, together, the results suggest that loss of Cdk5 leads to a progressive increase in neuronal and behavioral excitability, ultimately leading to seizures.

Abnormal expression and dysregulation of Cdk5 and its cofactors have been demonstrated in tissues from human cortical dysplasia [53] and hippocampal sclerosis [38,46,54]. KO of p35 leads to cortical lamination defects, seizures, and lethality [55–57]. Mice lacking p35 also display abnormal morphological and functional organization of the hippocampus, dysplastic hippocampi, heterotopic pyramidal cells, and granule cell dispersion and may serve as a model for cortical dysplasia [29,57]. In this study we show that chemically-induced status epilepticus and electroconvulsive shock in healthy animals induced acute generation of a Cdk5-activating cofactor, p25. Chronic loss of Cdk5 is associated with both seizures and reduced levels of p25. These published and new findings indicate that Cdk5 and its cofactors may play key regulatory roles in neuronal excitability.

Recent data have demonstrated dual roles for both Cdk5 and its activating cofactor, p25, in learning and plasticity [5,7]. A dichotomy may also exist for Cdk5/p25's role in pathological neuronal excitability associated with seizures. Loss of Cdk5 increases excitability and leads to seizures, which corresponds with decreased levels of p25. Acute seizures in healthy animals and chronic seizures in human epileptics produces elevated levels p25 [54]. During periods of increased  $Ca^{2+}$ -influx, neurons produce p25 following calpain activation [58]. Initially, Cdk5/p25 may serve as a homeostatic molecule to dampen excitatory transmission and inhibit seizure activity. However, over-excitation could result in excessive  $Ca^{2+}$ -influx and p25 generation, aberrant Cdk5 activity and neurotoxicity [59]. Thus, Cdk5 may serve to inhibit abnormal epileptiform activity when a neuron is in a normal state or promote cell death following excess and non-physiological  $Ca^{2+}$  influx. We previously showed that Cdk5 facilitates calpain-mediated degradation of the NR2B NMDAR subunit [7]. Cdk5 KO may impair calpain-mediated p25 generation and thereby disrupt normal homeostatic mechanisms that prevent seizures. Future studies on Cdk5, calpain, p25, and NR2B may better our understanding of the divergent roles for Cdk5 in neuronal physiology and disease.

Current anticonvulsant therapeutics increase inhibitory neurotransmission, suppress high frequency neuronal firing by reducing voltage-gated  $Na^+$  channels availability, or inhibit voltage-gated T-type  $Ca^{2+}$ -channels. Such therapeutic options produce unwanted side effects, are only efficacious in 70% of adults suffering from recurrent seizures [60], and generally alleviate the symptoms rather than curing or modifying the underlying etiology [27]. Aberrations in neuronal excitability can produce abnormal electrical discharges in the brain leading to seizure activity. Thus, a better understanding of the cellular mechanisms underlying neuronal excitability will aid in the development of novel therapeutics for seizures.

In future studies, it will be worthwhile to directly assess whether the increase in neuronal excitability following Cdk5 KO has any effects on presynaptic transmission, neuronal fiber sprouting, cell count, and cell survival. Furthermore, it would be interesting to study how long-term loss of Cdk5 affects hippocampal plasticity and learning. Although short-term loss of Cdk5 produced enhancements in plasticity and learning [7], it is possible that chronic loss of Cdk5 and the associated epileptiform activity leads to neurodegeneration and impaired synaptogenesis, learning, and structural plasticity [5,16].

## Materials and Methods

### Animals and reagents

All procedures have been conducted in accordance with relevant NIH, national and international guidelines and were approved by the UT Southwestern Institutional Animal Care and Use Committees. Unless otherwise noted, mice were housed 4 per cage in a colony maintained at 23°C with a 12 h light/dark cycle (lights on from 7:00 A.M. to 7:00 P.M.) and *ad libitum* food and water. Breeding, genotyping, and KO induction were performed as previously described [7]. Adult mice were treated with 4-hydroxytamoxifen for 15 days (66.67 mg per kg, *i.p.*). Post-KO time period refers to the time following end of hydroxytamoxifen treatment. Hydroxytamoxifen-dosed mice with *floxed Cdk5* alleles mice served as WT littermate controls, as previously reported [7]. As additional controls, electrophysiological and behavioral experiments were also performed on genetic control strains: vehicle-dosed and undosed mice with and without *Cre* transgene and *floxed Cdk5* alleles. All experiments were performed on adult male mice with experimenter blind to genotype. Unless otherwise specified, reagents were purchased from Sigma.

### Electrophysiological recordings

Transverse hippocampal slices from 8–14 week old males were prepared in cutting saline (200 mM sucrose, 3 mM KCl, 1.4 mM  $NaH_2PO_4$ , 26 mM  $NaHCO_3$ , 2 mM  $MgCl_2$ , 2 mM  $CaCl_2$ , 10 mM glucose) and maintained in an interface chamber containing artificial cerebrospinal fluid [61,62]. Extracellular field excitatory post-synaptic potentials (fEPSPs) in the Schaffer Collateral/CA1 hippocampal pathway (SC/CA1) were synaptically evoked at 0.033 Hz and recorded in the *stratum pyramidale* and *stratum radiatum* layers using a 64-channel array (150  $\mu$ m interpolar distance, MED-P5155, Alpha MED Sciences). Input-output measurements were performed as described [7] and, unless otherwise stated, fEPSPs were evoked using a stimulation intensity which elicited 50% maximal response. Data acquisition and analysis were performed using the Multielectrode MED64 hardware and software packages (Panasonic) essentially as described [7]. Stimulus artifacts were removed and additional analyses were performed using custom macros running under Igor Pro, Microsoft Excel, and Graphpad Prism. LTP experiments were performed as described [7]. Theta burst topography was assessed 2–4 weeks post Cdk5 KO as previously described [7,63]. fEPSP amplitudes in the *stratum radiatum* layer were measured with respect to the first fEPSP within each theta burst.

### Post-tetanic potentiation

Post-tetanic potentiation was assessed as previously described, 2–4 weeks post-KO [7]. Basal input/output measurements were performed to determine stimulus intensity to elicit 40% of the maximal fEPSP amplitude. Input/output analysis, paired-pulse facilitation, and tetani were performed in the absence of any drugs unless otherwise indicated. Post-tetanic potentiation (PTP) was

elicited in the presence of 75  $\mu\text{M}$  AP5. Baseline was followed by a brief 100 Hz tetanus [23] and post-tetanus recordings. PTP measurements were made on the initial recording after the tetanus. Measurements of fEPSP slope showed similar results.

### fEPSP measurements in $\text{Mg}^{2+}$ -free conditions and epileptiform activity

$\text{Mg}^{2+}$ -free fEPSP and epileptiform activity experiments were performed 4–8 weeks post-KO. fEPSP input/output measurements were made in regular ACSF to determine the stimulation intensities required for 20% and 100% of maximal fEPSP amplitudes. Baseline and  $\text{Mg}^{2+}$ -sensitive fEPSP amplitudes and areas were measured in regular ACSF and  $\text{Mg}^{2+}$ -free ACSF, respectively.  $\text{Mg}^{2+}$ -sensitive fEPSP measurements in the *stratum radiatum* were recorded using the 20%-maximal stimulation intensity, which allowed for accurate measurement of fEPSP magnitude in the absence of population spikes and epileptiform activity. Any fEPSP measurements contaminated with population spikes were excluded from calculations. Evoked population spikes and epileptiform activity in the *stratum pyramidale* were recorded in  $\text{Mg}^{2+}$ -free buffer. Input/output measurements were recorded in  $\text{Mg}^{2+}$ -free buffer in triplicate and analyzed for population spikes. Fiber volley amplitude versus stimulus intensity was not significantly changed after washout of  $\text{Mg}^{2+}$ . Maximum stimulation intensities were pre-determined by measuring the stimulus and fiber volley magnitudes necessary produced the maximum fEPSP magnitudes during basal input/output measurements. Stimulation intensities were binned and data was fit with a sigmoidal curve with  $R^2 > 95\%$ .

Gross  $\text{Na}^+$  channel function was assessed by calculating population spike threshold and measuring the effect of partial  $\text{Na}^+$  channel blockade in normal ACSF. Traditional input/output measurement were performed in regular  $\text{Mg}^{2+}$ -containing ACSF and visually analyzed for presence of population spikes in *stratum radiatum* and *stratum pyramidale*. Percentage of slices displaying population spikes versus fiber volley amplitude was plotted. After input/output measurements, a stable baseline was recorded at 20%-maximal stimulation. fEPSP magnitudes were measured after addition of 50 nM TTX. fEPSP amplitudes were plotted relative to baseline.

### fEPSP repolarization

Repolarization experiments were performed 2–4 weeks post-KO. Half-width was measured as the duration of fEPSP at the half-maximal amplitude in normal  $\text{Mg}^{2+}$ -containing ACSF. To examine contributions of  $\text{Na}^+$  channel, NMDAR, voltage-gated  $\text{Ca}^{2+}$  channel,  $\text{GABA}_A$ -mediated synaptic transmission on fEPSP amplitudes, slopes, and half-widths, fEPSPs were measured before and after treatment with 50 nM tetrodotoxin (TTX), 75  $\mu\text{M}$  AP5, 0.1 or 0.5 mM  $\text{NiCl}_2$ , and 2  $\mu\text{M}$  SR95531, respectively.

### Electroencephalographic (EEG)-Electromyographic (EMG) recordings

Adult male mice were surgically implanted for long-term EEG/EMG monitoring as previously described [64]. Mice were anesthetized with a mixture containing 25 mg/ml ketamine and 2.5 mg/ml xylazine (administered i.p. at a dose of 0.1 mL/mouse). They were then held in a stereotaxic frame fitted with a mouse adaptor (David Kopf Instruments, Tujunga, CA). The cranium was exposed, cleaned of all connective tissue, and 4 burr holes were drilled, anterior and posterior to bregma, bilaterally (AP 1.1,  $\text{ML} \pm 1.45$  and AP  $-3.5$ ,  $\text{ML} \pm 1.45$ ). A prefabricated

implant, with 4 EEG and 2 EMG electrodes, was then stereotaxically lowered and cemented to the skull using glass ionomer dental cement (Ketac-Cem Aplicap; ESPE, Norristown, PA). EMG wire electrodes were inserted contralaterally into the nuchal musculature using blunt dissection techniques. After suturing, the mouse was removed from the stereotaxic frame and allowed to recover from anesthesia. This design for the EEG/EMG implant allowed precise insertion of electrodes, targeting the frontal and occipital cortices at a consistent depth, just touching the dura, while minimizing surgical trauma.

EEG/EMG measurements were performed 8 weeks post-KO. Mice were housed individually under a 12 h light-dark cycle at  $24 \pm 1^\circ\text{C}$ , with standard laboratory chow (Harlan Teklad, Madison, WI) and water being replenished as necessary each day. Mice were not otherwise disturbed. They were habituated to these conditions for a week before EEG/EMG signals were recorded over 24 hour duration. Connections were made from the implanted cranial electrodes to the amplifier (Grass Model 78; Grass Instruments, West Warwick, RI) using a flexible, freely moving, lightweight cable. Amplified and filtered (EEG: 0.3–100 Hz; EMG: 30–300 Hz) signals were digitized at a sampling rate of 250 Hz, displayed using custom polygraph software, and archived for subsequent off-line analysis. Subsequently, the EEG/EMG record was visually screened for seizure epochs.

### Seizures and startle response behaviors

All behavioral experiments were performed with two groups of 8–14 week old males. The short-term KO group consisted of animals 2–4 weeks after Cdk5 loss (*i.e.*, 2–4 weeks following last does of hydroxytamoxifen). The chronic KO group consisted of animals 8 weeks following Cdk5 loss. Behavioral seizures were scored based on the Racine scale [29,65,66]. Seizure classes one through five were scored as mouth movements, head nodding or wet dog shakes, clonus, rearing, and rearing/falling, respectively. Behavioral seizure parameters such as wild running, tonic-clonic seizures, and tonus were also scored. To assess handling-induced seizures, animals which experienced daily handling were initially observed for signs of spontaneous seizures in home cage for 30 min and then assessed for 30 min after tail lift and scruffing. Handling-induced seizures typically included head nodding, clonus, or clonus with loss of balance. Chemically induced seizures were studied in mice 8-weeks post-KO. Animals were given scopolamine (2.75 mg/kg, *s.c.*) 5 min prior to pilocarpine (325 mg/kg, *i.p.*). Latency to and frequency of wet-dog shakes, clonus, tonus, rearing and falling and other seizures classes were recorded.

Startle response behaviors were studied 4–8 weeks post-KO using the SR-Lab system (San Diego Instruments) as described [23,67–69]. Audiogenic seizures were studied 2–4 weeks and 8 weeks post-KO and induced in a plexiglass shock box with clear front and rear walls (MedAssociates). Mice were scored for baseline behavior for 3 min and scored for seizure activity during exposure to a 90 db, 2,800 Hz pulse tone for 3 min. Frequency of and latency to wild running, tonic-clonic seizures, tonus, other seizure stages, and death were recorded.

### Pharmacologically-induced status epilepticus and electroconvulsive shock

Six-week old C57BL/6 (Charles River Labs) wild-type mice were injected with vehicle (saline, *i.p.*), kainate (50 mg/kg, *i.p.*; Tocris), scopolamine (2 mg/kg, *s.c.*)/saline (*i.p.*), or scopolamine (2 mg/kg, *s.c.*)/pilocarpine (280 mg/kg, *i.p.*). Scopolamine was injected 5 min prior to pilocarpine. Animals were scored for latencies to and frequencies of seizure stages including head

nodding, wet dog shakes, forelimb clonus, tonic-clonic seizures, rearing, and, rearing/falling. Hippocampi were dissected 25 min after first robust episode of rearing/falling, flash frozen, and stored at minus 80°C.

Electroconvulsive shock (ECS) was administered to adult male Sprague–Dawley rats (175–200 g) by delivering a current of 50 mA for 0.3 sec via bilateral ear clips essentially as described [70]. Hippocampi were dissected at the specified time-points after stimulation, flash frozen, and stored at minus 80°C. Animals which did not receive the shock served as controls.

### Immunoblot analysis

Frozen samples were sonicated in boiling 1% SDS containing 50 mM NaF and boiled for an additional 5 min. Protein concentrations were determined by the BCA protein assay (Pierce) using bovine serum albumin standards. An equal amount of total protein (100 µg) from each sample was subjected to SDS-PAGE followed by electrophoretic transfer to nitrocellulose membranes (Whatman). The membranes were immunoblotted using antibodies for p35/p25 (1:200; C-19 Santa Cruz) and alpha-tubulin (1:5000), followed by incubation with a horseradish peroxidase-conjugated anti-rabbit or anti-mouse secondary antibody (1:8000; Chemicon). Antibody binding was detected by autoradiography using the enhanced chemiluminescence immunoblotting detection system (Amersham Biosciences) and quantified by densitometry using Image J software (NIH).

### Statistical analysis

All data was represented at mean±s.e.m. Errors for fold changes were calculated using standard error propagation rules.

### References

- Benavides DR, Quinn JJ, Zhong P, Hawasli AH, DiLeone RJ, et al. (2007) Cdk5 modulates cocaine reward, motivation, and striatal neuron excitability. *J Neurosci* 27: 12967–12976.
- Bibb JA, Chen J, Taylor JR, Svenningsson P, Nishi A, et al. (2001) Effects of chronic exposure to cocaine are regulated by the neuronal protein Cdk5. *Nature* 410: 376–380.
- Bibb JA, Snyder GL, Nishi A, Yan Z, Meijer L, et al. (1999) Phosphorylation of DARPP-32 by Cdk5 modulates dopamine signalling in neurons. *Nature* 402: 669–671.
- Cheung ZH, Fu AKY, Ip NY (2006) Synaptic Roles of Cdk5: Implications in Higher Cognitive Functions and Neurodegenerative Diseases. *Neuron* 50: 13–18.
- Fischer A, Sananbenesi F, Pang PT, Lu B, Tsai LH (2005) Opposing roles of transient and prolonged expression of p25 in synaptic plasticity and hippocampus-dependent memory. *Neuron* 48: 825–838.
- Gilmore EC, Ohshima T, Goffinet AM, Kulkarni AB, Herrup K (1998) Cyclin-dependent kinase 5-deficient mice demonstrate novel developmental arrest in cerebral cortex. *J Neurosci* 18: 6370–6377.
- Hawasli AH, Benavides DR, Nguyen C, Kansy JW, Hayash K, et al. (2007) Cyclin-dependent kinase 5 governs learning and synaptic plasticity via regulation of NMDA receptor degradation. *Nature Neuroscience* 10: 880–886.
- Lagace DC, Benavides DR, Kansy JW, Mapelli M, Greengard P, et al. (2008) Cdk5 is essential for adult hippocampal neurogenesis. *Proc Natl Acad Sci U S A* 105: 18567–18571.
- Meyer DA, Richer E, Benkovic SA, Hayashi K, Kansy JW, et al. (2008) Striatal dysregulation of Cdk5 alters locomotor responses to cocaine, motor learning, and dendritic morphology. *Proc Natl Acad Sci U S A* 105: 18561–18566.
- Ohshima T, Ogura H, Tomizawa K, Hayashi K, Suzuki H, et al. (2005) Impairment of hippocampal long-term depression and defective spatial learning and memory in p35 mice. *J Neurochem* 94: 917–925.
- Ohshima T, Ward JM, Huh CG, Longenecker G, Veeranna, et al. (1996) Targeted disruption of the cyclin-dependent kinase 5 gene results in abnormal corticogenesis, neuronal pathology and perinatal death. *Proc Natl Acad Sci U S A* 93: 11173–11178.
- Patrick GN, Zukerberg L, Nikolic M, de la Monte S, Dikkes P, et al. (1999) Conversion of p35 to p25 deregulates Cdk5 activity and promotes neurodegeneration. *Nature* 402: 615–622.
- Sahin B, Hawasli AH, Greene RW, Molkenin JD, Bibb JA (2008) Negative regulation of cyclin-dependent kinase 5 targets by protein kinase C. *Eur J Pharmacol* 581: 270–275.

Differences between data groups were evaluated for significance using analysis of variance (*ANOVA*) with *post hoc t*-tests and statistical significance was set to  $p < 0.05$ .

### Supporting Information

**Figure S1** Representative EEG/EMG recordings from a wild-type control mouse. A, A period of normal wakefulness. B, Expanded view of 10 sec of the recording period shown in A. Calibration 1 sec and 50 µV; the recording period shown in panel B is annotated by the 10 sec bar in A.

Found at: doi:10.1371/journal.pone.0005808.s001 (0.19 MB TIF)

### Acknowledgments

We thank Shiori Ogawa, David R. Benavides, Janice W. Kansy, Jennifer Pick, Shari G. Birnbaum, Stephan J. Gold (Merck Research Laboratories), Paul Greengard (The Rockefeller University), and the Medical Scientist Training Program at University of Texas Southwestern Medical Center.

### Author Contributions

Conceived and designed the experiments: AHH JAB DCC. Performed the experiments: AHH. Analyzed the data: AHH JAB DCC. Contributed reagents/materials/analysis tools: AHH CMS JAB DCC. Wrote the paper: AHH JAB DCC. Designed and supervised the experiments conducted in his/her laboratory: JAB AEA CMP CMS. Performed experiments: DK KH. Designed and supervised the experiments conducted in his/her laboratory: JAB AEA CMP CMS DCC. Performed experiments: DK KH.

- Wei FY, Tomizawa K, Ohshima T, Asada A, Saito T, et al. (2005) Control of cyclin-dependent kinase 5 (Cdk5) activity by glutamatergic regulation of p35 stability. *J Neurochem* 93: 502–512.
- Hawasli AH, Bibb JA (2007) Alternative roles for Cdk5 in learning and synaptic plasticity. *Biotechnol J* 2: 941–948.
- Sananbenesi F, Fischer A, Wang X, Schrick C, Neve R, et al. (2007) A hippocampal Cdk5 pathway regulates extinction of contextual fear. *Nat Neurosci* 10: 1012–1019.
- Fischer A, Sananbenesi F, Schrick C, Spiess J, Radulovic J (2002) Cyclin-dependent kinase 5 is required for associative learning. *J Neurosci* 22: 3700–3707.
- Bibb JA (2003) Role of Cdk5 in neuronal signaling, plasticity, and drug abuse. *Neurosignals* 12: 191–199.
- Cruz JC, Tsai LH (2004) Cdk5 deregulation in the pathogenesis of Alzheimer's disease. *Trends Mol Med* 10: 452–458.
- Simpkins KL, Guttman RP, Dong Y, Chen Z, Sokol S, et al. (2003) Selective activation induced cleavage of the NR2B subunit by calpain. *J Neurosci* 23: 11322–11331.
- Yan Z, Chi P, Bibb JA, Ryan TA, Greengard P (2002) Roscovitine: a novel regulator of P/Q-type calcium channels and transmitter release in central neurons. *J Physiol* 540: 761–770.
- Buraei Z, Schofield G, Elmslie KS (2007) Roscovitine differentially affects CaV2 and Kv channels by binding to the open state. *Neuropharmacology* 52: 883–894.
- Powell CM, Schoch S, Monteggia L, Barrot M, Matos MF, et al. (2004) The presynaptic active zone protein RIM1alpha is critical for normal learning and memory. *Neuron* 42: 143–153.
- Weber P, Metzger D, Chambon P (2001) Temporally controlled targeted somatic mutagenesis in the mouse brain. *Eur J Neurosci* 14: 1777–1783.
- Kramar EA, Lin B, Lin CY, Arai AC, Gall CM, et al. (2004) A novel mechanism for the facilitation of theta-induced long-term potentiation by brain-derived neurotrophic factor. *J Neurosci* 24: 5151–5161.
- Kamiya H, Zucker RS (1994) Residual Ca<sup>2+</sup> and short-term synaptic plasticity. *Nature* 371: 603–606.
- McNamara JO, Huang YZ, Leonard AS (2006) Molecular signaling mechanisms underlying epileptogenesis. *Sci STKE* 2006: re12.
- Ohmori H, Sato Y, Namiki A (2004) The anticonvulsant action of propofol on epileptiform activity in rat hippocampal slices. *Anesth Analg* 99: 1095–1101. table of contents.
- Pitkanen A, Schwartzkroin PA, Moshe SL (2006) Models of Seizures and Epilepsy. Oxford: Elsevier. 687 p.

30. Baulac S, Gourfinkel-An I, Picard F, Rosenberg-Bourgin M, Prud'homme JF, et al. (1999) A second locus for familial generalized epilepsy with febrile seizures plus maps to chromosome 2q21-q33. *Am J Hum Genet* 65: 1078–1085.
31. Escayg A, Heils A, MacDonald BT, Haug K, Sander T, et al. (2001) A novel SCN1A mutation associated with generalized epilepsy with febrile seizures plus—nd prevalence of variants in patients with epilepsy. *Am J Hum Genet* 68: 866–873.
32. Escayg A, MacDonald BT, Meisler MH, Baulac S, Huberfeld G, et al. (2000) Mutations of SCN1A, encoding a neuronal sodium channel, in two families with GEFS+2. *Nat Genet* 24: 343–345.
33. Wallace RH, Wang DW, Singh R, Scheffer IE, George AL Jr, et al. (1998) Febrile seizures and generalized epilepsy associated with a mutation in the Na<sup>+</sup>-channel beta1 subunit gene SCN1B. *Nat Genet* 19: 366–370.
34. Madeja M (2000) Do neurons have a reserve of sodium channels for the generation of action potentials? A study on acutely isolated CA1 neurons from the guinea-pig hippocampus. *Eur J Neurosci* 12: 1–7.
35. Fisher RS, Coyle JT (1991) *Neurotransmitters and epilepsy*. New York: Wiley-Liss.
36. Mulley JC, Scheffer IE, Petrou S, Berkovic SF (2003) Channelopathies as a genetic cause of epilepsy. *Curr Opin Neurol* 16: 171–176.
37. Hardingham GE, Bading H (2003) The Yin and Yang of NMDA receptor signalling. *Trends Neurosci* 26: 81–89.
38. Sen A, Thom M, Martinian L, Jacobs T, Nikolic M, et al. (2006) Deregulation of cdk5 in Hippocampal sclerosis. *J Neuropathol Exp Neurol* 65: 55–66.
39. Fochtmann LJ (1994) Animal studies of electroconvulsive therapy: foundations for future research. *Psychopharmacol Bull* 30: 321–444.
40. Swinyard EA (1972) Electrically induced convulsions. In: *Experimental Models of Epilepsy*. Purpura DP, Penry D, Tower DW, DM, Walter R, eds. New York: Raven Press. pp 433–458.
41. Fletcher AI, Shuang R, Giovannucci DR, Zhang L, Bittner MA, et al. (1999) Regulation of exocytosis by cyclin-dependent kinase 5 via phosphorylation of Munc18. *J Biol Chem* 274: 4027–4035.
42. Shuang R, Zhang L, Fletcher A, Groblewski GE, Pevsner J, et al. (1998) Regulation of Munc-18/syntaxin 1A interaction by cyclin-dependent kinase 5 in nerve endings. *J Biol Chem* 273: 4957–4966.
43. Tomizawa K, Ohta J, Matsushita M, Moriwaki A, Li ST, et al. (2002) Cdk5/p35 regulates neurotransmitter release through phosphorylation and downregulation of P/Q-type voltage-dependent calcium channel activity. *J Neurosci* 22: 2590–2597.
44. Cheng K, Ip NY (2003) Cdk5: a new player at synapses. *Neurosignals* 12: 180–190.
45. Evans GJ, Cousin MA (2007) Activity-dependent control of slow synaptic vesicle endocytosis by cyclin-dependent kinase 5. *J Neurosci* 27: 401–411.
46. Graham ME, Anggono V, Bache N, Larsen MR, Craft GE, et al. (2007) The in vivo phosphorylation sites of rat brain dynamin I. *J Biol Chem* 282: 14695–14707.
47. Liang S, Wei FY, Wu YM, Tanabe K, Abe T, et al. (2007) Major Cdk5-dependent phosphorylation sites of amphiphysin 1 are implicated in the regulation of the membrane binding and endocytosis. *J Neurochem*.
48. Tan TC, Valova VA, Malladi CS, Graham ME, Berven LA, et al. (2003) Cdk5 is essential for synaptic vesicle endocytosis. *Nat Cell Biol* 5: 701–710.
49. Mikuni N, Babb TL, Ying Z, Najm I, Nishiyama K, et al. (1999) NMDA-receptors 1 and 2A/B coassembly increased in human epileptic focal cortical dysplasia. *Epilepsia* 40: 1683–1687.
50. Moddel G, Jacobson B, Ying Z, Janigro D, Bingaman W, et al. (2005) The NMDA receptor NR2B subunit contributes to epileptogenesis in human cortical dysplasia. *Brain Res* 1046: 10–23.
51. Najm IM, Ying Z, Babb T, Mohamed A, Hadam J, et al. (2000) Epileptogenicity correlated with increased N-methyl-D-aspartate receptor subunit NR2A/B in human focal cortical dysplasia. *Epilepsia* 41: 971–976.
52. Ying Z, Bingaman W, Najm IM (2004) Increased numbers of coassembled PSD-95 to NMDA-receptor subunits NR2B and NR1 in human epileptic cortical dysplasia. *Epilepsia* 45: 314–321.
53. Sisodiya SM, Thom M, Lin WR, Bajaj NP, Cross JH, et al. (2002) Abnormal expression of cdk5 in focal cortical dysplasia in humans. *Neurosci Lett* 328: 217–220.
54. Sen A, Thom M, Martinian L, Yogarajah M, Nikolic M, et al. (2007) Increased immunoreactivity of cdk5 activators in hippocampal sclerosis. *Neuroreport* 18: 511–516.
55. Chae T, Kwon YT, Bronson R, Dikkes P, Li E, et al. (1997) Mice lacking p35, a neuronal specific activator of Cdk5, display cortical lamination defects, seizures, and adult lethality. *Neuron* 18: 29–42.
56. Patel LS, Wenzel HJ, Schwartzkroin PA (2004) Physiological and morphological characterization of dentate granule cells in the p35 knock-out mouse hippocampus: evidence for an epileptic circuit. *J Neurosci* 24: 9005–9014.
57. Wenzel HJ, Robbins CA, Tsai LH, Schwartzkroin PA (2001) Abnormal morphological and functional organization of the hippocampus in a p35 mutant model of cortical dysplasia associated with spontaneous seizures. *J Neurosci* 21: 983–998.
58. Lee MS, Kwon YT, Li M, Peng J, Friedlander RM, et al. (2000) Neurotoxicity induces cleavage of p35 to p25 by calpain. *Nature* 405: 360–364.
59. Ketelaars SO, Gorter JA, van Vliet EA, Lopes da Silva FH, Wadman WJ (2001) Sodium currents in isolated rat CA1 pyramidal and dentate granule neurones in the post-status epilepticus model of epilepsy. *Neuroscience* 105: 109–120.
60. Arroyo S, Brodie MJ, Avanzini G, Baumgartner C, Chiron C, et al. (2002) Is refractory epilepsy preventable? *Epilepsia* 43: 437–444.
61. Cooper DC, Chung S, Spruston N (2005) Output-mode transitions are controlled by prolonged inactivation of sodium channels in pyramidal neurons of subiculum. *PLoS Biol* 3: e175.
62. Fowler MA, Sidiropoulou K, Ozkan ED, Phillips CW, Cooper DC (2007) Corticolimbic Expression of TRPC4 and TRPC5 Channels in the Rodent Brain. *PLoS ONE* 2: e573.
63. Lauterborn JC, Rex CS, Kramer E, Chen LY, Pandeyarajan V, et al. (2007) Brain-derived neurotrophic factor rescues synaptic plasticity in a mouse model of fragile X syndrome. *J Neurosci* 27: 10685–10694.
64. Chemelli RM, Willie JT, Sinton CM, Elmquist JK, Scammell T, et al. (1999) Narcolepsy in orexin knockout mice: molecular genetics of sleep regulation. *Cell* 98: 437–451.
65. Racine RJ (1972) Modification of seizure activity by electrical stimulation. I. After-discharge threshold. *Electroencephalogr Clin Neurophysiol* 32: 269–279.
66. Shah MM, Anderson AE, Leung V, Lin X, Johnston D (2004) Seizure-induced plasticity of h channels in entorhinal cortical layer III pyramidal neurons. *Neuron* 44: 495–508.
67. Geyer MA, Dulawa SC (2003) *Current Protocols in Neuroscience*, In: Jacqueline Crawley CG, Michael Rogawski, David Sibley, Phil Skolnick, Susan Wray, Ron McKay, Gwen Taylor, eds. John Wiley & Sons, Inc.
68. Blundell J, Tabuchi K, Bolliger MF, Blaiss CA, Brose N, et al. (2009) Increased anxiety-like behavior in mice lacking the inhibitory synapse cell adhesion molecule neuroligin 2. *Genes Brain Behav* 8: 114–126.
69. Kwon CH, Luikart BW, Powell CM, Zhou J, Matheny SA, et al. (2006) Pten regulates neuronal arborization and social interaction in mice. *Neuron* 50: 377–388.
70. Gold SJ, Heifets BD, Pudiak CM, Potts BW, Nestler EJ (2002) Regulation of regulators of G protein signaling mRNA expression in rat brain by acute and chronic electroconvulsive seizures. *J Neurochem* 82: 828–838.
